# Supplementary material
Source: PubMed Central journal article supplement (PMC3967863)
Supplement: NIHMS533862-supplement-Ta1.pdf [file NIHMS533862-supplement-Ta1.pdf]

**Appendix A. Supplementary Tables.**

**Table A1. Annual doses ( $\mu\text{Sv}$ ) from natural radiation sources to red bone marrow at three ages.**

|                                                                                                                       | Age group (years) |      |       |
|-----------------------------------------------------------------------------------------------------------------------|-------------------|------|-------|
|                                                                                                                       | 1                 | 10   | Adult |
| Terrestrial gamma rays                                                                                                | 420               | 380  | 330   |
| Directly ionizing cosmic rays                                                                                         | 270               | 250  | 210   |
| Cosmic ray neutrons                                                                                                   | 90                | 80   | 70    |
| Cosmic rays during air travel                                                                                         | 30                | 30   | 30    |
| Food and drink                                                                                                        | 600               | 530  | 340   |
| Radon ( $^{222}\text{Rn}$ ) and decay products in the home                                                            | 80                | 80   | 80    |
| Thoron ( $^{220}\text{Rn}$ ) and decay products                                                                       | 20                | 15   | 10    |
| Total from natural sources                                                                                            | 1520              | 1350 | 1070  |
| Sum of gamma, directly ionizing cosmic rays<br>and domestic radon (components measured in<br>epidemiological studies) | 770               | 710  | 620   |
