# Supplementary material
Source: PubMed Central journal article supplement (PMC3967863)
Supplement: NIHMS533862-supplement-Ta2.pdf [file NIHMS533862-supplement-Ta2.pdf]

**Table A2 Deciles of annual red bone marrow dose ( $\mu\text{Sv}$ ) from summed gamma (terrestrial + cosmic rays) and radon doses in GB for individuals and county districts.**

| Age group<br>(years)    | 1   | 2   | 3   | 4   | 5   | 6   | 7   | 8   | 9   | 10   |
|-------------------------|-----|-----|-----|-----|-----|-----|-----|-----|-----|------|
| <b>Individuals</b>      |     |     |     |     |     |     |     |     |     |      |
| <i>in utero</i>         | 230 | 290 | 330 | 360 | 380 | 410 | 430 | 460 | 500 | 580  |
| 1                       | 440 | 560 | 630 | 680 | 730 | 770 | 810 | 870 | 940 | 1190 |
| 5                       | 420 | 540 | 610 | 660 | 700 | 740 | 790 | 840 | 910 | 1160 |
| 10                      | 400 | 510 | 580 | 620 | 670 | 700 | 740 | 790 | 860 | 1100 |
| 15                      | 370 | 470 | 530 | 570 | 610 | 640 | 680 | 720 | 780 | 1020 |
| Adult                   | 360 | 450 | 510 | 550 | 590 | 620 | 660 | 700 | 760 | 990  |
| <b>County districts</b> |     |     |     |     |     |     |     |     |     |      |
| <i>in utero</i>         | 260 | 320 | 340 | 360 | 380 | 400 | 420 | 440 | 470 | 540  |
| 1                       | 510 | 610 | 660 | 690 | 720 | 760 | 800 | 840 | 890 | 1200 |
| 5                       | 500 | 590 | 640 | 670 | 700 | 740 | 770 | 810 | 860 | 1170 |
| 10                      | 470 | 560 | 600 | 630 | 660 | 700 | 730 | 770 | 820 | 1120 |
| 15                      | 430 | 510 | 550 | 570 | 600 | 640 | 660 | 700 | 740 | 1040 |
| Adult                   | 420 | 500 | 530 | 560 | 580 | 620 | 640 | 680 | 720 | 1020 |
