# Supplementary material
Source: PubMed Central journal article supplement (PMC3967863)
Supplement: NIHMS533862-supplement-Ta3.pdf [file NIHMS533862-supplement-Ta3.pdf]

**Table A3. Deciles of annual red bone marrow dose ( $\mu\text{Sv}$ ) from gamma and radon separately in GB, for individuals and for county districts**

| Age (years)              | 1   | 2   | 3   | 4   | 5   | 6   | 7   | 8   | 9   | 10  |
|--------------------------|-----|-----|-----|-----|-----|-----|-----|-----|-----|-----|
| <b>Individuals</b>       |     |     |     |     |     |     |     |     |     |     |
| <i>Terrestrial gamma</i> |     |     |     |     |     |     |     |     |     |     |
| <i>in utero</i>          | 220 | 290 | 320 | 350 | 370 | 400 | 420 | 450 | 490 | 560 |
| 1                        | 380 | 500 | 570 | 620 | 660 | 700 | 740 | 790 | 860 | 990 |
| 5                        | 370 | 490 | 550 | 590 | 630 | 680 | 720 | 770 | 830 | 960 |
| 10                       | 350 | 460 | 510 | 560 | 600 | 640 | 670 | 720 | 780 | 900 |
| 15                       | 310 | 410 | 460 | 500 | 540 | 570 | 610 | 650 | 700 | 810 |
| Adult                    | 300 | 400 | 450 | 490 | 520 | 550 | 590 | 630 | 680 | 780 |
| <i>Radon</i>             |     |     |     |     |     |     |     |     |     |     |
| <i>in utero</i>          | 0   | 0   | 0   | 10  | 10  | 10  | 10  | 10  | 20  | 50  |
| All postnatal ages       | 20  | 30  | 30  | 40  | 40  | 50  | 70  | 80  | 110 | 330 |
| <b>County districts</b>  |     |     |     |     |     |     |     |     |     |     |
| <i>Terrestrial gamma</i> |     |     |     |     |     |     |     |     |     |     |
| <i>in utero</i>          | 250 | 310 | 330 | 350 | 370 | 390 | 410 | 430 | 450 | 500 |
| 1                        | 450 | 540 | 590 | 620 | 650 | 690 | 730 | 760 | 800 | 890 |
| 5                        | 430 | 520 | 560 | 600 | 630 | 660 | 700 | 730 | 770 | 860 |
| 10                       | 400 | 490 | 530 | 560 | 590 | 620 | 660 | 690 | 730 | 810 |
| 15                       | 370 | 440 | 480 | 510 | 530 | 560 | 590 | 620 | 650 | 730 |
| Adult                    | 340 | 420 | 450 | 480 | 500 | 530 | 560 | 590 | 620 | 690 |
| <i>Radon</i>             |     |     |     |     |     |     |     |     |     |     |
| <i>in utero</i>          | 0   | 0   | 10  | 10  | 10  | 10  | 10  | 10  | 20  | 50  |
| All postnatal ages       | 30  | 40  | 40  | 50  | 60  | 60  | 70  | 90  | 120 | 400 |
