# Supplementary material
Source: PubMed Central journal article supplement (PMC3967863)
Supplement: NIHMS533862-supplement-Ta4.pdf [file NIHMS533862-supplement-Ta4.pdf]

**Table A4. Childhood leukemia incidence rates (per million per year) in the GB CCRG registry 1991-2000**

---

| Age | Male | Female |
|-----|------|--------|
| 0   | 36.1 | 34.5   |
| 1   | 57.5 | 50.9   |
| 2   | 97.1 | 85.1   |
| 3   | 98.9 | 79.3   |
| 4   | 78.9 | 62.9   |
| 5   | 49.3 | 43.8   |
| 6   | 42.3 | 31.2   |
| 7   | 43.8 | 23.9   |
| 8   | 29.1 | 24.6   |
| 9   | 27.1 | 19.4   |
| 10  | 27.6 | 22.1   |
| 11  | 29.7 | 21.1   |
| 12  | 25.8 | 23.0   |
| 13  | 23.2 | 16.9   |
| 14  | 31.6 | 20.2   |

---
